# Supplementary material
Source: publisher figshare collection journal article supplement (https://diabetesjournals.figshare.com/articles/dataset/_/19638765)
Supplement: Supplementary file 2 [file 1]

**Supplemental Table 1: Comparison of the sample in the full DPP cohort and at four fundus measurements (DPPOS year 01/05/11/16). Categorical variables are described as number of events (%), and continuous variables are described as mean (SD). P-values are calculated using Pearson's Chi-square test or ANOVA.**

|                                                      | Full         | Y01          | Y05          | Y11          | Y16          | p-value <sup>†</sup> |
|------------------------------------------------------|--------------|--------------|--------------|--------------|--------------|----------------------|
| <b>Sample size</b>                                   | 3234         | 899          | 2128         | 2086         | 1563         |                      |
| <b>Non-Hispanic White</b>                            | 1768 (54.7%) | 482 (53.6%)  | 1138 (53.5%) | 1090 (52.3%) | 779 (49.8%)  | <.0001               |
| <b>African American</b>                              | 645 (19.9%)  | 197 (21.9%)  | 425 (20.0%)  | 429 (20.6%)  | 325 (20.8%)  |                      |
| <b>Hispanic</b>                                      | 508 (15.7%)  | 164 (18.2%)  | 336 (15.8%)  | 326 (15.6%)  | 261 (16.7%)  |                      |
| <b>American Indian</b>                               | 171 (5.3%)   | 12 (1.3%)    | 127 (6.0%)   | 136 (6.5%)   | 120 (7.7%)   |                      |
| <b>Asian</b>                                         | 142 (4.4%)   | 44 (4.9%)    | 102 (4.8%)   | 105 (5.0%)   | 78 (5.0%)    |                      |
| <b>Male</b>                                          | 1043 (32.3%) | 319 (35.5%)  | 693 (32.6%)  | 653 (31.3%)  | 452 (28.9%)  | 0.013                |
| <b>Female</b>                                        | 2191 (67.7%) | 580 (64.5%)  | 1435 (67.4%) | 1433 (68.7%) | 1111 (71.1%) |                      |
| <b>Lifestyle</b>                                     | 1079 (33.4%) | 248 (27.6%)  | 698 (32.8%)  | 678 (32.5%)  | 500 (32.0%)  | 0.0863               |
| <b>Metformin</b>                                     | 1073 (33.2%) | 306 (34.0%)  | 712 (33.5%)  | 703 (33.7%)  | 541 (34.6%)  |                      |
| <b>Placebo</b>                                       | 1082 (33.5%) | 345 (38.4%)  | 718 (33.7%)  | 705 (33.8%)  | 522 (33.4%)  |                      |
| <b>Diabetes</b>                                      | 1696 (67.7%) | 595 (66.2%)  | 956 (44.9%)  | 1192 (57.1%) | 1026 (65.6%) | <.0001               |
| <b>Never smoking</b>                                 | 1897 (58.7%) | 510 (56.7%)  | 1269 (59.6%) | 1268 (60.8%) | 980 (62.7%)  | 0.0611               |
| <b>Current smoker</b>                                | 226 (7.0%)   | 69 (7.7%)    | 133 (6.3%)   | 121 (5.8%)   | 87 (5.6%)    |                      |
| <b>Previous smoker</b>                               | 1111 (34.4%) | 320 (35.6%)  | 726 (34.1%)  | 697 (33.4%)  | 496 (31.7%)  |                      |
| <b>Ever hypertension* up to the end</b>              | 2175 (86.6%) | 800 (90.5%)  | 1833 (87.4%) | 1815 (88.1%) | 1365 (88.0%) | 0.0402               |
| <b>Hypertension at baseline</b>                      | 679 (40.8%)  | 228 (47.0%)  | 448 (39.5%)  | 404 (37.4%)  | 273 (34.2%)  | <.0001               |
| <b>Ever dyslipidemia* up to the end</b>              | 2042 (80.0%) | 744 (83.1%)  | 1723 (81.2%) | 1715 (82.5%) | 1302 (83.4%) | 0.0401               |
| <b>Dyslipidemia* at baseline</b>                     | 1138 (35.2%) | 324 (36.0%)  | 770 (36.2%)  | 747 (35.8%)  | 543 (34.7%)  | 0.8846               |
| <b>Gestational diabetes</b>                          | 353 (16.1%)  | 102 (17.6%)  | 221 (15.4%)  | 229 (16.0%)  | 192 (17.3%)  | 0.6505               |
| <b>Ever pregnant</b>                                 | 1869 (85.3%) | 494 (85.2%)  | 1227 (85.5%) | 1224 (85.4%) | 960 (86.4%)  | 0.9303               |
| <b>Age at randomization</b>                          | 50.61(10.68) | 51.61(10.12) | 51.34( 9.95) | 50.38( 9.65) | 48.96( 8.99) | <.0001               |
| <b>Average HbA1c(%) up to the end</b>                | 6.05( 0.71)  | 6.28( 0.81)  | 6.06( 0.71)  | 6.07( 0.73)  | 6.09( 0.75)  | <.0001               |
| <b>Average fasting glucose (mg/dl) up to the end</b> | 113.9(17.98) | 120.9(21.23) | 114.0(17.77) | 114.6(18.22) | 114.8(18.23) | <.0001               |
| <b>Average 2-hour glucose (mg/dl) up to the end</b>  | 162.8(29.76) | 174.9(31.35) | 162.7(29.66) | 163.0(29.58) | 163.0(29.99) | <.0001               |
| <b>Average weight (kg) up to the end</b>             | 91.54(19.62) | 93.37(20.53) | 91.25(19.25) | 91.12(19.03) | 90.84(18.30) | 0.0809               |
| <b>Average SBP(mmHg) to the end</b>                  | 121.7(9.72)  | 122.7(9.88)  | 121.6(9.61)  | 121.4(9.47)  | 120.7(9.22)  | <.0001               |
| <b>Average DBP(mmHg) up to the end</b>               | 74.03(6.33)  | 74.22(6.55)  | 73.82(6.31)  | 73.74(6.16)  | 73.86(6.15)  | 0.4986               |

|                                             |              |              |              |              |              |        |
|---------------------------------------------|--------------|--------------|--------------|--------------|--------------|--------|
| <b>1/fasting insulin, baseline</b>          | 0.05(0.03)   | 0.05(0.03)   | 0.05(0.03)   | 0.05(0.03)   | 0.05(0.03)   | 0.0062 |
| <b>Oral Disposition Index</b>               | 3831(5280)   | 3706(4991)   | 3776(5496)   | 3788(5504)   | 3770(5269)   | 0.9464 |
| <b>HbA1c (%), baseline</b>                  | 5.91(0.50)   | 6.01(0.52)   | 5.92(0.49)   | 5.92(0.50)   | 5.90(0.49)   | <.0001 |
| <b>Weight (kg), baseline</b>                | 94.23(20.26) | 95.22(20.37) | 93.22(19.27) | 93.05(19.22) | 92.65(18.60) | 0.0243 |
| <b>Systolic BP (mm Hg), baseline</b>        | 123.7(14.69) | 125.1(15.06) | 123.2(14.44) | 122.8(14.56) | 121.7(13.82) | <.0001 |
| <b>Diastolic BP (mm Hg), baseline</b>       | 78.30(9.29)  | 78.61(9.62)  | 78.03(9.30)  | 78.13(9.28)  | 78.10(9.28)  | 0.493  |
| <b>BMI (kg/m<sup>2</sup>), baseline</b>     | 33.97(6.69)  | 34.21(6.70)  | 33.62(6.36)  | 33.62(6.39)  | 33.65(6.28)  | 0.155  |
| <b>Adiponectin (ug/mL), baseline</b>        | 7.93(3.47)   | 7.65(3.31)   | 8.03(3.55)   | 7.96(3.45)   | 7.82(3.22)   | 0.0717 |
| <b>CIR, baseline</b>                        | 0.63(0.43)   | 0.57(0.37)   | 0.63(0.43)   | 0.63(0.43)   | 0.64(0.43)   | 0.0001 |
| <b>Fasting glucose (mg/dL), baseline</b>    | 106.5(8.32)  | 109.3(9.12)  | 106.5(8.37)  | 106.4(8.39)  | 106.0(8.34)  | <.0001 |
| <b>120-minute glucose (mg/dL), baseline</b> | 164.6(17.04) | 168.1(17.39) | 164.5(17.01) | 164.6(17.03) | 164.6(16.92) | <.0001 |
| <b>HOMA B-cell, baseline</b>                | 225.7(128.4) | 225.8(123.5) | 224.6(129.3) | 223.9(127.8) | 225.4(128.2) | 0.9506 |
| <b>HOMA IR, baseline</b>                    | 7.08(4.19)   | 7.70(4.43)   | 7.04(4.17)   | 6.98(4.12)   | 6.93(4.01)   | <.0001 |
| <b>I30-I0/G30-G0 in μU/mg), baseline</b>    | 124.3(92.89) | 112.5(79.83) | 122.7(92.23) | 123.7(91.92) | 124.4(91.22) | 0.0031 |
| <b>ACR (mg/g), baseline</b>                 | 13.91(50.38) | 15.64(51.09) | 13.61(54.37) | 14.27(56.40) | 14.44(60.11) | 0.9032 |
| <b>hsCRP (mg/dL), baseline</b>              | 0.59(0.74)   | 0.59(0.75)   | 0.57(0.69)   | 0.59(0.75)   | 0.60(0.72)   | 0.9033 |
| <b>HDL-cholesterol (mg/dL), baseline</b>    | 45.61(11.78) | 45.09(11.47) | 46.01(12.18) | 45.91(12.04) | 45.89(11.79) | 0.5343 |
| <b>Total cholesterol (mg/dL), baseline</b>  | 203.1(36.36) | 204.2(34.96) | 203.5(35.68) | 203.8(35.65) | 202.9(34.73) | 0.67   |
| <b>LDL-cholesterol (mg/dL), baseline</b>    | 124.6(32.85) | 125.5(32.66) | 124.7(32.50) | 124.9(32.38) | 124.3(31.63) | 0.8892 |
| <b>Triglycerides (mg/dL), baseline</b>      | 163.4(95.86) | 167.6(95.56) | 163.5(96.82) | 164.0(96.95) | 163.2(99.20) | 0.6617 |
| <b>Duration (years) of T2D in the end</b>   | 6.77(6.96)   | 10.46(7.16)  | 7.02(7.05)   | 7.52(7.13)   | 8.32(7.54)   | <.0001 |

† p-value calculated between different time points of retinal photography (Y01, Y05, Y011, Y016)

\* Dyslipidemia defined as LD-cholesterol >130, triglycerides >150 or HDL-cholesterol <40. Hypertension defined as SBP >140, DBP >90 or taking any anti-hypertension medicine

**Supplemental Table 2:**

**Retinopathy Severity by ETDRS Grade at DPPOS Years 1, 5, 11 and 16**

| <b>ETDRS grade</b> | <b>Year 1</b> | <b>Year 5</b> | <b>Year 11</b> | <b>Year 16</b> |
|--------------------|---------------|---------------|----------------|----------------|
| <b>Total</b>       | 899           | 2128          | 2086           | 1563           |
| <b>&lt;20</b>      | 800           | 1922          | 1848           | 1418           |
| <b>20</b>          | 85            | 184           | 180            | 85             |
| <b>35</b>          | 7             | 16            | 46             | 49             |
| <b>43</b>          | 7             | 5             | 6              | 6              |
| <b>47</b>          | 0             | 0             | 1              | 1              |
| <b>53</b>          | 0             | 0             | 1              | 0              |
| <b>60</b>          | 0             | 0             | 2              | 0              |
| <b>61</b>          | 0             | 1             | 0              | 1              |
| <b>65</b>          | 0             | 0             | 2              | 1              |
| <b>71</b>          | 0             | 0             | 0              | 1              |
| <b>85</b>          | 0             | 0             | 0              | 1              |
| <b>&gt;=20</b>     | 99            | 206           | 238            | 145            |
| <b>&gt;20</b>      | 14            | 22            | 58             | 60             |
